1       **Title: Prevalence of Depressive symptoms and its associated factors among**  
2       **elderly living in old age homes of Kathmandu Metropolitan City, Nepal**

3       **Authors:** Sanju Maharjan<sup>1\*</sup>, Nujan Tiwari<sup>1</sup>, Sita Bista<sup>1</sup>, Prem Basel<sup>1,2</sup>

4       Author's Affiliations: <sup>1</sup>Central Department of Public Health, Institute of Medicine, Tribhuvan  
5       University, Maharajgunj, 44600, Nepal; <sup>2</sup>Tampere University, Finland

6       **\*Corresponding author**

7       Sanju Maharjan

8       Central Department of Public Health, Institute of Medicine

9       Tribhuvan University

10      Maharajgunj, 44600, Nepal

11      Email: [maharjansanju05@gmail.com](mailto:maharjansanju05@gmail.com)

12      **Abstract**

13      **Background**

14      Depressive symptoms have become a global public health problem, with a predominant effect on  
15      the elderly people. The studies on mental health status of elderly people in Nepal are quite  
16      limited. In this study, we aim to assess the prevalence of depressive symptoms and its associated  
17      factors among the elderly living in public old age homes of Kathmandu Metropolitan City in  
18      Nepal.

19      **Methodology**

20      A cross-sectional study was conducted including 142 adults aged 60 years and above recruited  
21      through proportional simple random sampling from six old age homes. The 15 item-Geriatric

22 Depression Scale(GDS) was used to assess the depressive symptoms among the participants.

23 Associated factors were tested using Chi-square test; and a p-value of less than 0.05 with a  
24 confidence interval of 95% was used for statistical significance.

## 25 **Results**

26 More than half of the study participants, 58.5% (95% CI: 49.9%-66.7%) were found to have  
27 depressive symptoms. Among them, 38.7% had mild symptoms, 16.2% had moderate symptoms  
28 and 3.5% had severe symptoms. Age (OR = 2.25, 95% CI: 1.08-4.66), sex (OR = 2.36, 95% CI:  
29 1.17-4.75), past family type (OR = 0.44, 0.22-0.89), chronic physical health problem (OR = 0.34,  
30 95% CI: 0.12-0.98) and feelings of loneliness were found to have significant association with  
31 depressive symptoms among the elderly population.

## 32 **Conclusion**

33 The prevalence of depressive symptoms among the elderly in old age homes in Kathmandu  
34 Metropolitan City is quite high and a concerning issue that requires targeted mental health  
35 programs and interventions in order to bring about a positive shift in their mental health  
36 condition.

## 37 **Introduction**

38 The World Health Organization (WHO) defines depression as a mental health disorder that  
39 presents with persistently depressed mood, loss of interest or pleasure in previously pleasurable  
40 activities, decreased energy, feelings of guilt or low self-worth, disturbed sleep or appetite, and  
41 poor concentration. (1). Depressive symptoms can affect the quality of life and is one of the  
42 leading causes of disability worldwide(2,3) Everyone is susceptible to mental health problems,  
43 whatever stage of life they might be at. However, the elderly are at an even higher risk of mental

44 health problems including anxiety and depression, with depression being the most common  
45 psychiatric disorder in later life(3,4)

46 Deep rooted social stigma, misconceptions and serious inadequacies with regards to information,  
47 resources and health facilities, all act as barriers to accessing proper mental health services,  
48 especially in developing countries. Nepal government has limited number of trained human  
49 resources and funds for the effective and efficient implementation of the National policy, act and  
50 regulations on ageing and the problems of the elderly. As such, the unique health needs of  
51 elderly people have largely been neglected(5). Further, a 3.5% population growth rate of the  
52 elderly is a challenge to the existing healthcare demand in the country. (6)

53 While it is true that additional years of life open up a wide range of opportunities and  
54 contributions to society, we cannot be oblivious to the fact that it all depends on the health of the  
55 population. (7). Multiple risk factors leading to mental health problems at any point in life have  
56 been identified but the stressors that have been deemed significant among elderly people include  
57 depreciation of physical, social and cognitive functions from illness, retirement, bereavement,  
58 loss of income and disability(7,8). The presence of one or more of these risk factors often result  
59 in isolation, loneliness and distress in elderly people that require a significant amount of  
60 care(3,7). They are commonly perceived as a burden to family and society, making them all the  
61 more vulnerable to physical and emotional abuse, abandonment and financial crisis. This  
62 compels them to opt for other places to live a free and respectful life, and old age homes are  
63 often their only support to do so(4,9). Depressive symptoms have been found to be more common  
64 in institutionalized old people. As these symptoms usually coexist with other organic health  
65 problems, mental health symptoms are overlooked and often left untreated(3,8).

66 There have been a few studies conducted in Nepal among the elderly. In a study conducted by  
67 Chalise, the prevalence of depression among elderly living in old age homes of Devghat area of  
68 Nepal was found to be 57.8%.(10). A study by Ghimire et al comparing the prevalence of  
69 depression between elderly living in old age homes and those living in the community reported  
70 52.73% prevalence in the old age homes which was twice of that in the community; 25.45%(11).  
71 Another study by Dhungana et al found presence of depression among 80.7% of the elderly  
72 participating in their study(12) These studies suggested that age, gender, ethnicity, poor  
73 perception of life, poor social relationships, chronic organic diseases, lack of entertainment  
74 activities were associated with higher levels of depression. Kathmandu Metropolitan City houses  
75 the largest and most diverse population demographics in the country and also has the greatest  
76 number of operational old age homes in Nepal. There is limited data regarding the prevalence of  
77 depression in these institutions. Thus, this study aims to assess the prevalence of depressive  
78 symptoms and its associated factors among the elderly people living at old age homes in  
79 Kathmandu Metropolitan City, Nepal.

## 80 **Methodology**

### 81 **Study design and participants**

82 This is an institutional based cross-sectional study conducted in six old age homes in Kathmandu  
83 Metropolitan City. The conceptualization and literature of the study was conducted from  
84 December 2021. After receiving ethical approval from the Institutional Review Board (IRB) of  
85 IOM on 16 March 2022 [Approval number: 371 (6-11) E<sup>2</sup> 078/079], participant recruitment and  
86 data collection was conducted from 22 March 2022 to 5 April 2022. The study population  
87 consists of the adults of age 60 years and over, of all public old age homes in the study site. The

88 elderly who could not communicate verbally and who did not understand Nepali language were  
89 excluded from the study.

## 90 **Sampling procedure**

91 There are 6 old age homes working in coordination with Kathmandu Metropolitan City.  
92 According to the Metropolitan office, the total number of elderly living there is 198 and the total  
93 sample size of this study is 142. Proportionate simple random sampling was applied to select the  
94 participants. The proportion of sample from the total population is 71.72%. There are 22, 9, 7,  
95 31, 31, 98 elderly living in 6 old age homes of Kathmandu Metropolitan City. So, the sample  
96 proportion for the study in each old age home was 16, 7, 5, 22, 22, and 70 respectively. The  
97 participants were selected randomly.

## 98 **Study variables**

99 Dependent variable: Depression

100 Independent variables:

101 Socio-demographic characters of the elderly: Age, sex, ethnicity, marital status, education, past  
102 family type, present source of income

103 Health status: Presence of chronic medical illnesses

104 Individual factors: Feelings of loneliness

## 105 **Study tools**

106 Data collection was done with face-to-face interview with selected participants from the  
107 representative sample. The tool was pretested in one of the old age homes outside the study area.

108 Structured and validated short form of Geriatric Depression Scale (GDS 15) was used to assess  
109 depressive symptoms.(13)It consists of a 15 ‘Yes/No’ questions to measure depressive  
110 symptoms. Scoring range of 0 to 4 is considered to be normal, 5 to 8 is mild, 9 to 11 is moderate  
111 and 12 to 15 indicates severe depression. .

### 112 **Data management and analysis**

113 Collected data was entered in Epidata version 3.1 software and exported to SPSS v20 for further  
114 analysis. The questions were scored accordingly to calculate the total score and level of  
115 depressive symptoms. For further analysis, the variables were dichotomized into normal and  
116 presence of depressive symptoms. The association between depressive symptoms and different  
117 variables was tested using the chi-square test. If p-value was less than 0.05 at a 95% confidence  
118 interval, then the association between dependent and independent variables was considered  
119 statistically significant.

### 120 **Ethical consideration**

121 Ethical approval was obtained from the Institutional Review Committee (IRC) of the Institute of  
122 Medicine (IOM). Official letter of cooperation from the Central Department of Public Health  
123 was written to the administrative office of the Kathmandu Metropolitan City and permission was  
124 also obtained from each of the old age homes regarding data collection from their residents.  
125 Verbal informed consent was obtained from all study participants to allow the use of anonymous  
126 data in research. Confidentiality of the information was maintained.

### 127 **Results**

128 Table 1 summarizes the socio-demographic characteristics of the respondents. A total of 142  
129 elderly participated in the study. The mean age of the participants was 76.37 years (SD: 8.21

130 years). The minimum age of the respondents was 60 years while the maximum age was 100  
131 years. Majority of the participants of our study were females (64.1%), with 35.9% being males.  
132 52.8% of the participants were of Brahmin/Chhetri ethnicity while the rest were Janajatis  
133 (indigenous groups). A majority of the elderly (61.3%) had already lost their partners during the  
134 study. More than half, 56.3% lived with joint family in the past and 57% had at least one source  
135 of income. 90.1% of the participants could not read and write.

136 With regards to their physical health; the majority, 63.2% had musculoskeletal problems,  
137 followed by hypertension (26.4%), gastro-enteric problems (21.6%), diabetes mellitus (21.6%),  
138 respiratory problems (20.8%) and others (4%).

139 **Table 1 Socio-demographic characteristics of the respondents**

140 **n=142**

| <b>Characteristics</b>                                                       | <b>Number</b> | <b>Percentage</b> |
|------------------------------------------------------------------------------|---------------|-------------------|
| <b>Age in years (Mean (<math>\pm</math> SD) = 76.37<math>\pm</math>8.21)</b> |               |                   |
| 60-79                                                                        | 91            | 64.1              |
| 80 and above                                                                 | 51            | 35.9              |
| <b>Sex</b>                                                                   |               |                   |
| Male                                                                         | 51            | 35.9              |
| Female                                                                       | 91            | 64.1              |

|                         |     |      |
|-------------------------|-----|------|
| <b>Ethnicity</b>        |     |      |
| Janajati                | 67  | 47.2 |
| Brahmin/Chhetri         | 75  | 52.8 |
| <b>Marital status</b>   |     |      |
| Single                  | 22  | 15.5 |
| Married                 | 17  | 12.0 |
| Widow/widower           | 87  | 61.3 |
| Separated/divorced      | 16  | 11.3 |
| <b>Education status</b> |     |      |
| Can read and write      | 14  | 9.9  |
| Cannot read and write   | 128 | 90.1 |
| <b>Past family type</b> |     |      |
| Nuclear                 | 62  | 43.7 |
| Joint                   | 80  | 56.3 |
| <b>Source of income</b> |     |      |
| Yes                     | 81  | 57.0 |



|                        |    |      |
|------------------------|----|------|
| No                     | 61 | 43.0 |
| <b>Type of source*</b> |    |      |
| Pension                | 1  | 1.1  |
| Old age allowance      | 72 | 79.1 |
| Savings                | 3  | 3.3  |
| Business               | 15 | 16.5 |

141 \*Multiple response

142 **Health status of the respondents**

143 Table 2 shows that a large group, 88% of the respondents had chronic health problems.

144 **Table 2 Health status of the respondents**

145 **n=142**

| <b>Characteristics</b>         | <b>Number</b> | <b>Percentage</b> |
|--------------------------------|---------------|-------------------|
| <b>Chronic health problems</b> |               |                   |
| Yes                            | 125           | 88                |
| No                             | 17            | 12                |
| <b>Type of Problem*</b>        |               |                   |
| Gastroenteric problems         | 27            | 21.6              |

|                          |    |      |
|--------------------------|----|------|
| Respiratory problems     | 26 | 20.8 |
| Hypertension             | 33 | 26.4 |
| Diabetes                 | 27 | 21.6 |
| Musculoskeletal problems | 79 | 63.2 |
| Others                   | 5  | 4    |

146 *\*Multiple response*

147 **Individual factor of the respondents**

148 Feeling of loneliness was studied under individual factor. 45.5% of the respondents shared that  
149 they felt lonely.

150 **Table 3 Individual factor of the respondents**

151 **n=142**

| <b>Characteristics</b>       | <b>Number</b> | <b>Percentage</b> |
|------------------------------|---------------|-------------------|
| <b>Feeling of loneliness</b> |               |                   |
| Yes                          | 65            | 45.8              |
| No                           | 77            | 54.2              |

152

153 **Prevalence of depressive symptoms among elderly living in old age homes**

154 The study revealed overall prevalence was found to be 58.5% (95% CI: 49.9%-66.7%). 38.7%  
155 elderly were found to have mild depressive symptoms, followed by 16.2% with moderate  
156 symptoms and 3.5% with severe depressive symptoms.

157 **Table 4 Prevalence of depressive symptoms among elderly**

158 **n=142**

| Level of depressive symptoms | Number | Percentage |
|------------------------------|--------|------------|
| Normal                       | 59     | 41.5       |
| Mild                         | 55     | 38.7       |
| Moderate                     | 23     | 16.2       |
| Severe                       | 5      | 3.5        |

159  
160 **Association of risk factors with depressive symptoms**

161 Table 5 represents the association of depressive symptoms with different variables. It was found  
162 that age, sex and past family type were statistically significant with depressive symptoms.  
163 Elderly of age 80 and above were 2.25 times more likely to have depressive symptoms than  
164 those of age 60-79 (OR = 2.25, 95% CI: 1.08-4.66). Similarly, females were 2.36 times more  
165 likely to have symptoms than males (OR = 2.36, 95%CI: 1.17-4.75). Likewise, elderly who  
166 previously lived with joint families were found to be protected against depressive symptoms in  
167 comparison to those living in nuclear families (OR = 0.44, 0.22-0.89).

168 Suffering from a chronic physical health problem (p=0.039) was found to be statistically  
 169 significant for depressive symptoms. Elderly who suffered from chronic physical health  
 170 problems were found to be more prone to have depressive symptoms (OR = 0.34, 95% CI: 0.12-  
 171 0.98). The feeling of loneliness (p=0.006) was found to be statistically significant with  
 172 depressive symptoms. Having feelings of loneliness made them vulnerable to depressive  
 173 symptoms (OR = 0.38, 95% CI: 0.19-0.77s)

174

175 **Table 5 Association between depressive symptoms and risk factors**

176 n=142

| Characteristics  | Normal<br>n (%) | Depressive<br>Symptoms<br>n(%) | $\chi^2$<br>value | p<br>value    | OR<br>(95% CI) |
|------------------|-----------------|--------------------------------|-------------------|---------------|----------------|
| <b>Age</b>       |                 |                                |                   |               |                |
| 60-79 years      | 44(48.4)        | 47(51.6)                       | 4.828             | <b>0.028*</b> | 2.25           |
| 80 and above     | 15(29.4)        | 36(70.6)                       |                   |               | (1.08-4.66)    |
| <b>Sex</b>       |                 |                                |                   |               |                |
| Male             | 28(54.9)        | 23(45.1)                       | 5.843             | <b>0.016*</b> | 2.36           |
| Female           | 31(34.1)        | 60(65.9)                       |                   |               | (1.17-4.75)    |
| <b>Ethnicity</b> |                 |                                |                   |               |                |

|          |          |          |       |       |      |
|----------|----------|----------|-------|-------|------|
| Janajati | 32(47.8) | 35(52.2) | 2.016 | 0.156 | 1.63 |
|----------|----------|----------|-------|-------|------|

|                 |        |        |  |  |             |
|-----------------|--------|--------|--|--|-------------|
| Brahmin Chhetri | 27(36) | 48(64) |  |  | (0.83-3.18) |
|-----------------|--------|--------|--|--|-------------|

**Marital status**

|        |         |          |       |       |  |
|--------|---------|----------|-------|-------|--|
| Single | 8(36.4) | 14(63.6) | 1.328 | 0.722 |  |
|--------|---------|----------|-------|-------|--|

|         |         |          |  |  |  |
|---------|---------|----------|--|--|--|
| Married | 7(41.2) | 10(58.8) |  |  |  |
|---------|---------|----------|--|--|--|

|               |          |          |  |  |  |
|---------------|----------|----------|--|--|--|
| Widow/widower | 39(44.8) | 48(55.2) |  |  |  |
|---------------|----------|----------|--|--|--|

|                    |         |          |  |  |  |
|--------------------|---------|----------|--|--|--|
| Separated/divorced | 5(31.3) | 11(68.8) |  |  |  |
|--------------------|---------|----------|--|--|--|

**Education status**

|                    |         |         |       |       |      |
|--------------------|---------|---------|-------|-------|------|
| Can read and write | 5(35.7) | 9(64.3) | 0.218 | 0.641 | 0.76 |
|--------------------|---------|---------|-------|-------|------|

|                       |          |          |  |  |             |
|-----------------------|----------|----------|--|--|-------------|
| Cannot read and write | 54(42.2) | 74(57.8) |  |  | (0.24-2.40) |
|-----------------------|----------|----------|--|--|-------------|

**Past family type**

|         |          |          |       |               |      |
|---------|----------|----------|-------|---------------|------|
| Nuclear | 19(30.6) | 43(69.4) | 5.388 | <b>0.020*</b> | 0.44 |
|---------|----------|----------|-------|---------------|------|

|       |        |        |  |  |             |
|-------|--------|--------|--|--|-------------|
| Joint | 40(50) | 40(50) |  |  | (0.22-0.89) |
|-------|--------|--------|--|--|-------------|

**Source of income**

|     |          |          |       |       |      |
|-----|----------|----------|-------|-------|------|
| Yes | 35(43.2) | 46(56.8) | 0.214 | 0.644 | 1.17 |
|-----|----------|----------|-------|-------|------|

|    |          |          |  |  |             |
|----|----------|----------|--|--|-------------|
| No | 24(39.3) | 37(60.7) |  |  | (0.60-2.31) |
|----|----------|----------|--|--|-------------|

**Suffering from  
chronic problem**

|     |          |          |       |               |             |
|-----|----------|----------|-------|---------------|-------------|
| Yes | 48(38.4) | 77(61.6) | 4.624 | <b>0.039*</b> | 0.34        |
| No  | 11(64.7) | 6(35.3)  |       |               | (0.12-0.98) |

**Feeling of loneliness**

|     |          |          |       |               |             |
|-----|----------|----------|-------|---------------|-------------|
| Yes | 19(29.2) | 46(70.8) | 7.490 | <b>0.006*</b> | 0.38        |
| No  | 40(51.9) | 37(48.1) |       |               | (0.19-0.77) |

---

177 *\*Statistically significant (p<0.05)*

178 **Discussion**

179 Depression is an important public health problem but the stigma and ignorance lingering around  
180 it prevents the true statistics of depression from being studied. Early identification and diagnosis  
181 of depressive symptoms help improve quality of life of the sufferer. Through this study, we  
182 aimed to determine the prevalence of depressive symptoms among the elderly living in old age  
183 homes of Kathmandu and ascertain the association between depressive symptoms and study  
184 characteristics. Our study shows association of depressive symptoms with age, sex, past family  
185 type, chronic physical health problems and feelings of loneliness.

186 58.5% of the respondents in our study were found to have depressive symptoms. Regarding its  
187 severity, mild depression was the most common (38.7%), followed by moderate symptoms  
188 (16.2%) while 3.5% of the elderly had severe symptoms. Another study conducted among the  
189 elderly in old age homes of Kathmandu valley by Kafle et al had found the prevalence of

190 depression to be 47.3%, of which 34% had mild depression and 13.3% had severe  
191 depression(14). These variations could be due to variation in the study settings and coverage of a  
192 larger study area. Another study looking at the association of depression with the quality of life  
193 among the elderly had revealed the prevalence of depression to be 39.6%(15). Increased  
194 prevalence rate in our study could be a reflection of the impacts of COVID-19 pandemic which  
195 led to mobility restrictions imposed by the old age homes. This seems to be slightly higher than  
196 the rates of depression in India, Bangladesh(16,17).

197 Our study reports a higher prevalence of depressive symptoms among the females. This finding  
198 is consistent with other studies in this realm.(10,15). Increasing age was considered an important  
199 predictor of increasing depression in a study conducted by Zou et al among the inpatients of a  
200 tertiary care center in China(18). Being a female had greater association with depressive  
201 symptoms as suggested by other studies too(10,12,19). This might also be a result of lesser  
202 opportunities to females and them being more susceptible to discrimination in our society, which  
203 leads to a lower self-esteem and generates a feeling of helplessness..

204 Past family type was also identified as an important predictor of depressive symptoms. Only  
205 50% of the participants who formerly were part of a joint family had depressive symptoms while  
206 69.4% of those from nuclear families had depressive symptoms in our study. A possible reason  
207 behind this finding could be that those with joint families feel more satisfied and happy to have  
208 spent time with their family members in contrast to nuclear families. Similarly, there was a  
209 significant association between presence of chronic health problems and depressive symptoms.  
210 The association between chronic medical illnesses and depressive symptoms has also been  
211 established in other studies.(20,21). People with chronic ailments like arthritis, diabetes mellitus,  
212 heart diseases and chronic pulmonary diseases have been found to be at a higher risk of

213 developing depression(21)The functional limitation brought about by these chronic illnesses are  
214 considered as the most important factor leading to depressive symptoms.(20)

215 There is also a close association between feelings of loneliness and depressive symptoms.  
216 Studies have shown that loneliness leads to serious health consequences; including depression.  
217 Those of higher age groups are reportedly found to have higher rates of loneliness due to loss of  
218 spouse, family, and social disengagement(22). This is largely due to having to live in old age  
219 homes after losing their family members, or partner or being separated from their family  
220 members. Loss of family members and abandonment ultimately render elderly with feelings of  
221 helplessness and loneliness.

222 Study characteristics like ethnicity, marital status, education and source of income were not  
223 found to have statistically significant association with depressive symptoms. In contrast, some  
224 studies have found ethnicity and education to be associated with depressive symptoms(19,23). A  
225 possible explanation for the variability is that these studies were community-based with  
226 participants from a diverse group of communities within the sample. There is limited literature  
227 exploring the association between marital status and source of income with depressive  
228 symptoms.

## 229 **Limitations**

230 The results of our study should be interpreted in light of several limitations. As the study is  
231 conducted with a cross-sectional design, causal inference cannot be established. Face to face  
232 interview approach was adopted as a majority of the respondents did not know how to read and  
233 write. As the old age homes consist of a significant number of elderly living with disability,



234 further research with appropriate methodology on them would be better. The outcomes of the  
235 study also cannot be generalized to any other region of the country.

## 236 **Conclusion**

237 This study has revealed an alarming prevalence of depressive symptoms among the elderly living  
238 in old age homes of Kathmandu, which also be taken as a representation for the entire country.  
239 Timely identification and appropriately planned interventions can help reduce the burden.  
240 Policies, strategies and activities need to be introduced in collaboration with different health  
241 institutions to address the problem.

## 242 **Data availability**

243 The datasets available and analyzed would be available from the corresponding author upon  
244 request.

245 **Conflict of interest:** None

## 246 **Funding statement**

247 The research was not funded by any institution.

248 **Acknowledgement:** The authors would like to thank administrative offices, old age homes  
249 and all the participants of the study

## 250 **References**

251 1. Depression [Internet]. [cited 2021 Nov 1]. Available from:  
252 <https://www.who.int/westernpacific/health-topics/depression>

- 253 2. Depression [Internet]. [cited 2021 Nov 1]. Available from: [https://www.who.int/news-room/fact-](https://www.who.int/news-room/fact-sheets/detail/depression)  
254 sheets/detail/depression
- 255 3. Mental health of older adults [Internet]. [cited 2021 Nov 4]. Available from:  
256 <https://www.who.int/news-room/fact-sheets/detail/mental-health-of-older-adults>
- 257 4. Parkar SR. Elderly Mental Health: Needs. *Mens Sana Monogr.* 2015;13(1):91–9.
- 258 5. Shrestha L. Geriatric health in Nepal: concerns and experience. *Nepal Med Coll J NMCJ.* 2013  
259 Jun;15(2):148–52.
- 260 6. Nepal-Census-2011-Vol1.pdf [Internet]. [cited 2021 Nov 4]. Available from:  
261 [https://unstats.un.org/unsd/demographic-social/census/documents/Nepal/Nepal-Census-2011-](https://unstats.un.org/unsd/demographic-social/census/documents/Nepal/Nepal-Census-2011-Vol1.pdf)  
262 Vol1.pdf
- 263 7. Ageing and health [Internet]. [cited 2021 Nov 6]. Available from: [https://www.who.int/news-](https://www.who.int/news-room/fact-sheets/detail/ageing-and-health)  
264 room/fact-sheets/detail/ageing-and-health
- 265 8. Jaul E, Barron J. Age-Related Diseases and Clinical and Public Health Implications for the 85 Years  
266 Old and Over Population. *Front Public Health.* 2017 Dec 11;5:335.
- 267 9. Akbar S, Tiwari S, Tripathi R, Kumar A, Pandey N. Reasons for Living of Elderly to In Old Age  
268 Homes: An Exploratory Study. *Int J Indian Psychol.* 2014 Oct 12;2.
- 269 10. Chalise HN. Depression among elderly living in Briddashram (old age home). *Adv Aging Res*  
270 [Internet]. 2014 Feb 6 [cited 2021 Nov 7];2014. Available from:  
271 <http://www.scirp.org/journal/PaperInformation.aspx?PaperID=42627>
- 272 11. Ghimire H, Pokharel P, Shyangwa P, Baral D, Aryal A, Mishra A. ORIGINAL RESEARCH  
273 ARTICLE. 2012;4.

- 274 12. Dhungana AR. Factors Associated with Depression among Elderly People Living In Old Aged  
275 Homes of Pokhara, Nepal. *J Health Allied Sci.* 2020 May 12;10(1):8–12.
- 276 13. Risal A, Giri E, Shrestha O, Manandhar S, Kunwar D, Amatya R, et al. Nepali Version of Geriatric  
277 Depression Scale-15 – A Reliability and Validation Study. *J Nepal Health Res Counc.*  
278 2019;17(4):506–11.
- 279 14. Kafle B, Sharma VD, Ojha SP, Chapagain M, Tulachan P, Dhungana S. Prevalence of Depression  
280 among elderly living in old age homes of Kathmandu Valley and its association with  
281 Sociodemographic variants. *J Psychiatr Assoc Nepal.* 2015;4(1):43–7.
- 282 15. Shrestha K, Ojha SP, Dhungana S, Shrestha S. Depression and its association with quality of life  
283 among elderly: An elderly home- cross sectional study. *Neurol Psychiatry Brain Res.* 2020 Dec  
284 1;38:1–4.
- 285 16. Zalavadiya DD, Banerjee A, Sheth AM, Rangoonwala M, Mitra A, Kadri AM. A Comparative Study  
286 of Depression and Associated Risk Factors among Elderly Inmates of Old Age Homes and  
287 Community of Rajkot: A Gujarati Version of the Geriatric Depression Scale-Short Form (GDS-G).  
288 *Indian J Community Med Off Publ Indian Assoc Prev Soc Med.* 2017;42(4):204–8.
- 289 17. Rahman MdS, Rahman MdA, Ali M, Rahman MdS, Maniruzzaman Md, Yeasmin MstA, et al.  
290 Determinants of depressive symptoms among older people in Bangladesh. *J Affect Disord.* 2020 Mar  
291 1;264:157–62.
- 292 18. Zou C, Chen S, Shen J, Zheng X, Wang L, Guan L, et al. Prevalence and associated factors of  
293 depressive symptoms among elderly inpatients of a Chinese tertiary hospital. *Clin Interv Aging.* 2018  
294 Sep 13;13:1755–62.

- 295 19. Yadav UN, Thapa TB, Mistry SK, Pokhrel R, Harris MF. Socio-demographic characteristics, lifestyle  
296 factors, multi-morbid conditions and depressive symptoms among Nepalese older adults. BMC  
297 Psychiatry. 2020 May 26;20(1):261.
- 298 20. Han J. Chronic Illnesses and Depressive Symptoms Among Older People: Functional Limitations as  
299 a Mediator and Self-Perceptions of Aging as a Moderator. J Aging Health. 2018 Sep;30(8):1188–204.
- 300 21. Wilson-Genderson M, Heid AR, Pruchno R. Onset of Multiple Chronic Conditions and Depressive  
301 Symptoms: A Life Events Perspective. Innov Aging. 2017 Sep 1;1(2):igx022.
- 302 22. Singh A, Misra N. Loneliness, depression and sociability in old age. Ind Psychiatry J. 2009;18(1):51–  
303 5.
- 304 23. Simkhada R, Wasti SP, GC VS, Lee ACK. Prevalence of depressive symptoms and its associated  
305 factors in older adults: a cross-sectional study in Kathmandu, Nepal. Aging Ment Health. 2018 Jun  
306 3;22(6):802–7.
- 307
